# Supplementary material for: Atypical meiosis can be adaptive in outcrossed Schizosaccharomyces pombe due to wtf meiotic drivers
Source: eLife. 2020 Aug 13;9:e57936. doi: 10.7554/eLife.57936 (PMC7426094; doi:10.7554/eLife.57936)
Supplement: Figure 1—figure supplement 3—source data 1. — Each of the rows represents the relevant genotype and allele transmission of the indicated diploid. The first column shows the S. pombe diploid assayed. In columns 2–5 are the SZY strain number and relevant genotypes used to determine the allele transmission for chromosome 1 and chromosome 3. Columns 6–12 indicate the number of spores that exhibited the indicated phenotypes. The total number of spores assayed is shown in column 13. Column 14 indicates the percentage of the spores that were likely disomes (Ade+ and HygR). Column 15 indicates the percentage of the spores (shown in column 8) that were Ade+ HygS. Ade+ HygR spores were excluded to calculate these percentages. The last column shows the total number of independent diploids assayed for each cross. [file elife-57936-fig1-figsupp3-data1.xlsx]

## Sheet: Sheet1
S. pombe isolate	allele 1 SZY#	GENOTYPE	allele 2 SZY#	GENOTYPE	Lys+ G418S	Lys- G418R	Ade+ HygS	Ade- HygR	Chr1-only disomes (Lys+ G418R)	Chr3-only disomes (Ade+ HygR)	Chr1 and Chr3 disomes (Lys+ G418R, Ade+ HygR)	# progeny assayed	% Ade+ HygR	% ade+ (excluding disomes)	# diploids assayed
Sp	2750	lys1+, ade6-::hphMX	2752	lys1-::kanMX ade6+	108	92	106	94	7	14	11	232	0.108	0.53	4
	1178	lys1+, ade6-::hphMX	2752	lys1-::kanMX ade6+	60	48	48	60	5	1	2	116	0.026	0.444	2
					168	140	154	154	12	15	13	348	0.0805	0.5	6
JB910	2722	lys1+, ade6-::hphMX	2724	lys1-::kanMX ade6+	113	106	108	111	4	4	2	229	0.026	0.493	4
JB878	2712	lys1+, ade6-::hphMX	2714	lys1-::kanMX ade6+	106	114	108	112	4	6	2	232	0.034	0.491	4
Sk	1518	lys1+, ade6-::hphMX	2756	lys1-::kanMX ade6+	110	108	113	105	5	4	4	231	0.035	0.518	3
JB862	2838	lys1+, ade6-::hphMX	2840	lys1-::kanMX ade6+	101	115	117	99	3	4	9	232	0.056	0.542	4
JB879	2850	lys1+, ade6-::hphMX	2852	lys1-::kanMX ade6+	102	110	96	116	6	2	12	232	0.06	0.453	4
JB873	2842	lys1+, ade6-::hphMX	2844	lys1-::kanMX ade6+	115	95	115	95	7	9	6	232	0.065	0.548	4
JB899	2718	lys1+, ade6-::hphMX	2720	lys1-::kanMX ade6+	197	155	210	142	14	6	21	393	0.069	0.597	6
JB942	3709	lys1+, ade6-::hphMX	3721	lys1-::kanMX ade6+	105	92	94	103	7	6	14	224	0.089	0.477	4
JB4	2704	lys1+, ade6-::hphMX	2706	lys1-::kanMX ade6+	123	112	107	128	9	13	18	275	0.113	0.455	4
JB852	2828	lys1+, ade6-::hphMX	2830	lys1-::kanMX ade6+	87	93	72	108	14	4	22	220	0.118	0.4	4
JB939	3233	lys1+, ade6-::hphMX	3235	lys1-::kanMX ade6+	110	140	122	128	5	10	25	290	0.121	0.488	5
JB840	2916	lys1+, ade6-::hphMX	2918	lys1-::kanMX ade6+	99	90	95	94	9	15	28	241	0.178	0.503	3
JB853	3236	lys1+, ade6-::hphMX	3238	lys1-::kanMX ade6+	88	93	85	96	8	14	29	232	0.185	0.47	4
JB854	2832	lys1+, ade6-::hphMX	2834	lys1-::kanMX ade6+	81	83	84	80	11	17	28	220	0.205	0.512	4
JB844	2214	lys1+, ade6-::hphMX	3076	lys1-::kanMX ade6+	70	79	79	70	26	33	24	232	0.246	0.53	4
JB848	2824	lys1+, ade6-::hphMX	2826	lys1-::kanMX ade6+	106	114	124	96	16	28	84	348	0.322	0.564	6
