# Supplementary material for: Atypical meiosis can be adaptive in outcrossed Schizosaccharomyces pombe due to wtf meiotic drivers
Source: eLife. 2020 Aug 13;9:e57936. doi: 10.7554/eLife.57936 (PMC7426094; doi:10.7554/eLife.57936)
Supplement: Figure 1—source data 1. — Each column represents the diploid assayed, which matches the diploid number in Figure 1. The second row shows the diploid number. The third row shows the SZY strain numbers of both haploid parent strains. We present all the viable spore yield values from independent assays. We calculated the p-value using the Wilcoxon test by comparing the heterozygous diploid to the homozygous parent 1 (p1) and parent 2 (p2) strains. Diploid one was compared to control diploids 8 (p1) and 9 (p2); diploid two was compared to control diploids 8 (p1) and 10 (p2); diploid three was compared to control diploids 8 (p1) and 11 (p2); diploid four was compared to control diploids 8 (p1) and 12 (p2); diploid five was compared to control diploids 9 (p1) and 10 (p2); diploid six was compared to control diploids 9 (p1) and 11 (p2); and diploid seven was compared to control diploids 9 (p1) and 12 (p2). The last two rows show the relative fertility (f) when compared to the homozygous parent 1 and parent 2. [file elife-57936-fig1-data1.xlsx]

## Sheet: Sheet1
		Figure 1 (VSY values)
		Diploid 1	Diploid 2	Diploid 3	Diploid 4	Diploid 5	Diploid 6	Diploid 7	Diploid 8	Diploid 9	Diploid 10	Diploid 11	Diploid 12
		297x480	643x2221	643x2111	643x2222	197x2221	197x2111	197x2222	2464x2538	180x186	2221x2212	2111x2213	2222x2153
		0.0781818	0.333367	0.509369	0.378783	0.487182	0.239048	0.626997	2.38125	3.45	1.94619	3.67013	7.39286
		0.0808511	0.195462	0.511161	0.372553	0.208531	0.280027	0.406341	2.57647	2.736	1.50366	4.00235	6.66383
		0.117073	0.121982	0.332236	0.0554401	0.450619	0.15675	1.089	3.33529	2.43529	2.03636	3.53165	5.36087
		0.1	0.119483		0.714095	0.145199	0.159261	0.878838	1.89184	2.52	2.4659	4.45846	5.28197
		0.220588	0.202243			0.0602609	0.175018	0.71348	1.9575		2.87746	3.82785	4.60909
		0.0456522	0.30855			0.31873	0.206082		1.6875		2.51739	2.688
			0.293192			0.354557	0.17985		1.764		2.89726	2.99032
			0.226875						1.84186		2.32941	5.17895
									2.286
	average	0.107058	0.225144	0.450922	0.380218	0.289297	0.199434	0.74293	2.1913	2.78532	2.3217	3.79346	5.86172
	stdev	0.0605484	0.0815165	0.102789	0.268958	0.158142	0.0456876	0.257794	0.524997	0.460849	0.476731	0.788982	1.134
	p-value p1	0.009524	0.0001554	0.01212	0.01587	0.0003108	0.0003108	0.007937	control	control	control	control	control
	p-value p2	0.0003996	8.227e-05	0.009091	0.002797	0.006061	0.006061	0.01587	control	control	control	control	control
	relative f p1	0.0488558	0.102745	0.205778	0.173512	0.103865	0.0716016	0.26673	1	1	1	1	1
	relative f p2	0.0384364	0.0969737	0.118868	0.0648645	0.124605	0.052573	0.126743
