# Supplementary material for: Atypical meiosis can be adaptive in outcrossed Schizosaccharomyces pombe due to wtf meiotic drivers
Source: eLife. 2020 Aug 13;9:e57936. doi: 10.7554/eLife.57936 (PMC7426094; doi:10.7554/eLife.57936)
Supplement: Figure 1—source data 2. — Each of the rows represents the relevant genotype and allele transmission of the indicated diploid. The first column matches the diploid number from Figure 1. Columns 2–5 contain the SZY strain number and relevant genotypes used to determine the allele transmission for chromosome 3. Columns 6–8 indicate the number of spores that exhibited the indicated phenotype. The total number of spores assayed is shown in column 9. Column 10 indicates the percentage of disomic spores (Ade+ HygR). Column 11 indicates the p-values calculated when comparing the frequency of Ade+ HygR spores produced by heterozygous diploids to the frequency of Ade+ HygR spores produced by both homozygous diploid parent strains. Diploid one was compared to control diploids 8 and 9; diploid two was compared to control diploids 8 and 10; diploid three was compared to control diploids 8 and 11; diploid four was compared to control diploids 8 and 12; diploid five was compared to control diploids 9 and 10; diploid six was compared to control diploids 9 and 11; and diploid seven was compared to control diploids 9 and 12. Column 12 shows the percentage of the spores that were Ade+ HygS (excluding Ade+ HygR spores). Column 13 indicates the p-value calculated when comparing diploids 2–4 to diploid 8 and diploids 5–7 to diploid 9. The last column shows the total number of independent diploids assayed for each cross. [file elife-57936-fig1-data2.xlsx]

## Sheet: Sheet1
Diploid #	allele 1 SZY#	ade6 GENOTYPE	allele 2 SZY#	ade6 GENOTYPE	Ade+ HygS	Ade- HygR	Ade+ HygR	# progeny assayed	% Ade+ HygR (disomy)	p value for disomy	% ade+ (excluding disomes)	p value for % allele 2 (excluding disomes)	# diploids assayed
1	480	ade6+	297	ade6∆::hphMX	7	47	198	252	0.786	2.2E-16, 2.2E-16	0.13	0.0001487	6
2	643	ade6+	2221	ade6∆::hphMX	34	142	287	463	0.62	2.2E-16, 2.2E-16	0.193	3.506e-06	8
3	643	ade6+	2111	ade6∆::hphMX	6	145	81	232	0.349138	1.552e-08, 1.35e-09	0.04	6.661e-16	3
4	643	ade6+	2222	ade6∆::hphMX	44	43	141	228	0.618	2.2E-16, 0.02242	0.506	0.9011	4
5	197	ade6+	2221	ade6∆::hphMX	269	84	179	532	0.336	2.2E-16, 2.2E-16	0.762	1.691e-05	6
6	197	ade6+	2111	ade6∆::hphMX	40	34	258	332	0.777	2.2E-16, 2.2E-16	0.541	0.4074	7
7	197	ade6+	2222	ade6∆::hphMX	162	51	151	364	0.415	2.2E-16, 0.4196	0.761	0.0001722	5
8	2538	ade6+	2464	ade6∆::hphMX	105	97	19	221	0.086	control	0.5198	control	4
9	180	ade6+	186	ade6∆::hphMX	171	208	23	402	0.0572	control	0.45119	control	6
10	2212	ade6+	2221	ade6∆::hphMX	227	208	24	459	0.0523	control	0.52184	NA	8
11	2213	ade6+	2111	ade6∆::hphMX	174	227	48	449	0.1069	control	0.4339	NA	8
12	2153	ade6+	2222	ade6∆::hphMX	157	146	256	559	0.458	control	0.5182	NA	6
