# Supplementary material for: Atypical meiosis can be adaptive in outcrossed Schizosaccharomyces pombe due to wtf meiotic drivers
Source: eLife. 2020 Aug 13;9:e57936. doi: 10.7554/eLife.57936 (PMC7426094; doi:10.7554/eLife.57936)
Supplement: Figure 2—source data 1. — Each of the horizontal lines represents the relevant genotype and allele transmission of the indicated diploid. The first column matches the diploid number from Figure 2, Figure 2—figure supplement 1, Figure 2—figure supplement 2, and Figure 2—figure supplement 3. In columns 2–5 are the SZY strain number and relevant genotypes used to determine the allele transmission for chromosome 3. Columns 6 and 7 show the indicated the number of ura+ or ura- spores excluding disomes. Columns 9–11 indicate the number of haploid spores that exhibited the indicated phenotype. Column 15 indicates the total number of spores assayed excluding NatR HygR and G418R HygR spores. Column 16 indicates the total number of spores assayed. Column 17 shows the total number of independent diploids assayed for each cross. Columns 18 and 19 indicate the p-values calculated with a G-test when comparing diploids 13, 33–35, and 41–43 to control diploid 14; diploid 15 to control diploid 16; diploid 44 to control diploid 45; and diploids 24, 31, 32, 36–40, and 46 to control diploid 23. We found 44 additional colonies for diploid 46 that lacked both markers at ade6. The diploid numbers carry over between figures, meaning that the raw data for diploids 23 and 24 are also presented in Figure 4—source data 1 and Figure 6—source data 1. The data for diploids 14 and 23 were previously published in Bravo Núñez et al., 2020. [file elife-57936-fig2-data1.xlsx]

## Sheet: Sheet1
diploid #	allele 1 SZY#	GENOTYPE	allele 2 SZY#	GENOTYPE	ura+	ura-	% ura+	NATR	NATS	NATR HYGR	% NATR HYGR	% NATR (excluding NATR HYGR)	% NATS (excluding NATR HYGR)	# progeny assayed (w/o disomes)	# progeny assayed	# diploids assayed	p-value % NATR, HYGR	p-value % allele 1
13	3511	ade6-::FY29033 wtf36:natMX4	3582	Sk wtf4∆, ura4-::FY29033 wtf35:kanMX4, ade6-::Sp wtf13:hphMX6	10	21	32.26	10	21	64	67.4	32.3	67.74	31	95	2
	3511	ade6-::FY29033 wtf36:natMX4	3581	Sk wtf4∆, ura4-::FY29033 wtf35:kanMX4, ade6-::Sp wtf13:hphMX6	60	163	26.906	96	127	289	56.445	43.049	56.951	223	512	7
	3512	ade6-::FY29033 wtf36:natMX4	3582	Sk wtf4∆ ,ura4-::FY29033 wtf35:kanMX4, ade6-::Sp wtf13:hphMX6	50	132	27.47	41	141	373	67.207	22.527	77.473	182	555	8
					120	316	27.5	147	289	726	62.5	33.7	66.3	436	1162	17	2.2e-16	3.189e-05
14	3509	ade6-::natMX4	3954	ura4-::kanMX, ade6∆::hphMX6	242	197	55.125	247	192	20	4.357	56.264	43.736	439	459	6	control	control
15	3654	ade6-::FY29033 wtf36:natMX4	3855	Sk wtf4∆, ura4-::FY29033 wtf35:kanMX, ade6-::Sp wtf13:hphMX	NA	NA	NA	13	17	318	91.4	43.3	56.7	30	348	6	9.356e-11	0.5779
16	3656	ade6-::natMX4	3850	ura4-::kanMX, ade6-::hphMX6	NA	NA	NA	85	76	95	37.1	52.8	47.2	161	256	6	control	control
44	3181	ura4-::FY29033 wtf35:kanMX4, ade6-::Sk wtf4:natMX4	3195	ura4-::Sk wtf28:kanMX4, ade6-::FY29033 wtf36:hphMX6	NA	NA	NA	27	75	129	55.84	26.47	73.53	102	231	4
	3182	ura4-::FY29033 wtf35:kanMX4, ade6-::Sk wtf4:natMX4	3197	ura4-::Sk wtf28:kanMX4, ade6-::FY29033 wtf36:hphMX6	NA	NA	NA	22	90	120	51.72	19.64	80.36	112	232	4
								49	165	249	53.78	22.89	77.1	214	463	8	2.2e-16	0.0001051
45	3399	ura4-::kanMX4, ade6-::natMX4	3113	ura4-::kanMX4, ade6-::hphMX6	NA	NA	NA	122	135	17	6.2044	47.471	52.529	257	274	5	control	control
35	3511	ade6-::FY29033 wtf36:natMX4	748	ade6∆::hphMX6	114	94	54.8	195	13	14	6.306	93.8	6.25	208	222	4	0.3074	0.0009028
diploid #	allele 1 SZY#	GENOTYPE	allele 2 SZY#	GENOTYPE	ura+	ura-	% ura+ (control)	G418R	G418S	G418R HYGR	% G418R HYGR	% allele 1	% allele 2	# progeny assayed (w/o GENR HYGR)	# progeny assayed	# diploids assayed	p-value % GENR, HYGR	p-value % allele 1
23	925	ade6-::kanMX4	1180	ade6-::hphMX6	584	513	53.24	452	645	116	9.6	41.2	58.797	1097	1213	9	control	control
24	887	ade6-::Sk wtf4:kanMX4	1293	ade6-::Sk wtf28:hphMX6	105	120	0.466667	163	62	766	77.3	72.4	27.556	225	991	23	1.826e-06	2.2e-16
31	887	ade6-::Sk wtf4:kanMX4	1180	ade6-::hphMX6	96	99	49.231	186	9	37	15.948	95.385	4.61	195	232	4	0.0145	8.862e-13
32	1293	ade6-::Sk wtf28:hphMX6	925	ade6-::kanMX4	149	109	57.752	19	239	32	11.034	92.636	7.364	258	290	5	0.5005	2.354e-14
33	1404	ade6-::Sp wtf13:hphMX6	1516	ade6-::kanMX4	92	129	41.629	3	218	25	10.163	98.643	1.357	221	246	5	0.006246	0.0001498
34	3621	ade6-::FY29033 wtf35:hphMX6	1516	ade6-::kanMX4	90	120	42.857	13	197	22	9.483	93.81	6.19	210	232	4	0.01534	0.0008585
36	1151	ade6-::Sk wtf28:kanMX4	2430	ade6-::FY29033 wtf36:hphMX6	28	26	51.85	24	30	179	76.82	44.44	55.56	54	233	5	2.2e-16	0.7645
37	2225	ade6-::FY29033 wtf35:kanMX4	2430	ade6-::FY29033 wtf36:hphMX6	26	36	41.94	42	20	161	72.197	67.74	32.26	62	223	4	2.2e-16	0.01853
38	2523	ade6-::Sk wtf4:kanMX4	2430	ade6-::FY29033 wtf36:hphMX6	25	34	42.37	38	21	170	74.24	64.41	35.59	59	229	4	2.2e-16	0.04143
39	2225	ade6-::FY29033 wtf35:kanMX4	2532	ade6-::Sk wtf28:hphMX6	23	19	54.76	31	11	160	79.21	73.81	26.19	42	202	4	2.2e-16	0.01867
40	2225	ade6-::FY29033 wtf35:kanMX4	969	ade6-::Sk wtf4:hphMX6	80	81	49.69	137	24	93	36.61	85.093	14.91	161	254	8	2.2e-16	2.646e-08
41	1485	ade6-:: Sk wtf4:kanMX4	1535	ade6-::Sp wtf13:hphMX6	30	32	48.39	41	21	170	73.276	66.12	33.871	62	232	4
	1486	ade6-:: Sk wtf4:kanMX4	1537	ade6-::Sp wtf13:hphMX6	30	33	47.62	44	19	53	45.69	69.84	30.159	63	116	2
					60	65	48	85	40	223	64.1	68	32	125	348	6	2.2e-16	0.461
42	1496	ade6-:: Sp wtf13:kanMX4	3621	ade6-::FY29033 wtf35:hphMX6	63	37	63	74	26	147	59.51	74	26	100	247	5	2.2e-16	0.2436
43	1496	ade6-:: Sp wtf13:kanMX4	2431	ade6-::FY29033 wtf36:hphMX6	38	37	50.67	41	34	149	66.52	54.67	45.33	75	224	4	2.2e-16	0.6557
46	1051	ade6-::Sk wtf4poison:kanMX4	1351	ade6-::Sk wtf28poison:hphMX6	74	96	43.53	126	44	5	2.857	74.118	25.882	170	175	3	0.001865	8.358e-06
