# Supplementary material for: Atypical meiosis can be adaptive in outcrossed Schizosaccharomyces pombe due to wtf meiotic drivers
Source: eLife. 2020 Aug 13;9:e57936. doi: 10.7554/eLife.57936 (PMC7426094; doi:10.7554/eLife.57936)
Supplement: Figure 2—source data 2. — Each column represents the diploid assayed, which matches the diploid number in Figure 2, Figure 2—figure supplement 1, Figure 2—figure supplement 2, and Figure 2—figure supplement 3. The first row of each table indicates in which figure these data are reported. The second row shows the diploid number. The third row shows the SZY strain numbers of both haploid parent strains. We present all of the viable spore yield values from independent assays. We calculated the p-value using the Wilcoxon test by comparing diploids 13, 33–35, and 41–43 to control diploid 14; diploid 15 to control diploid 16; diploid 44 to control diploid 45; and diploids 24, 31, 32, 36–40, and 46 to control diploid 23. The diploid numbers carry over between figures, meaning that the raw data for diploids 23 and 24 are also presented in Figure 4—source data 2 and Figure 6—source data 2. The data for diploids 14 and 23 were previously published in Bravo Núñez et al., 2020. [file elife-57936-fig2-data2.xlsx]

## Sheet: Sheet1
		Figure 2 (VSY values)						Figure 2-figure supplement 2 (VSY values)
		Diploid 13			Diploid 14	Diploid 15	Diploid 16	Diploid 44		Diploid 45
		3511x3582	3511x3581	3512x3582	3509x3954	3654x3855	3850x3656	3181x3195		3113x3399
		0.1035	0.144964	0.135	3.68855	0.223457	0.938793	0.0804375		0.9438
		0.106615	0.106816	0.179581	2.66518	0.3201	1.089	0.0456923		0.715629
			0.161333	0.3195	2.9645	0.314217	0.5082	0.033		1.1495
			0.0674043	0.1595	2.94525	0.2574	0.746743	0.0312632		1.97381
			0.579857	0.066825	3.01744	0.252	0.884813	0.0465882		0.847
			0.159107	0.121	3.85817	0.3168	0.736676
			0.129938	0.04356
				0.178962
	average	0.162557			3.18985	0.280662	0.817371	0.0473962		1.12595
	stdev	0.123823			0.471374	0.0415266	0.20008	0.0197662		0.499695
	p-value	0.0003536			control	0.002165	control	0.007937		control
	fertility relative to control	0.0509606			1	0.0879861	0.256241	0.0420945		1
		Figure 2-figure supplement 1 (VSY values of control diploids and diploids with hemizygous wtf drivers)						Figure 2-figure supplement 3 (VSY values)
		Diploid 23	Diploid 31	Diploid 32	Diploid 33	Diploid 34	Diploid 35	diploid 24		Diploid 46
		925x1180	887x1180	1293x925	1404x1516	3621x1516	3511x748	887x1293		1051x1351
		2.56235	1.25625	1.26964	1.29412	1.14286	1.36364	0.0932885	0.5566	0.0101563
		2.04732	1.25	0.932727	1.41667	1.28889	1.46	0.111984	0.394293	0.0134921
		1.9602	1.24773	1.78571	1.77419	1.5098	1.01724	0.281962	0.63525	0.0178571
		2.01465	1.43617	1.79592	1.45455	1.88889	1.725	0.259875	0.294938
		2.51965		1.70833	1.12195			0.0531667	0.266694
		2.55678						0.105	0.236739
		2.88538						0.509371	0.3267
		4.56879						0.0714098	0.314135
		4.27223						0.639196	0.578531
								0.555176	0.420316
								0.420316	0.899609
								0.66825
	average	2.82082	1.29754	1.49847	1.41229	1.45761	1.39147	0.377948		0.0138352
	stdev	0.960617	0.0924924	0.383228	0.240333	0.324685	0.292552	0.224654		0.00386189
	p-value	control	0.002797	0.000999	0.004329	0.009524	0.009524	1.579e-05		0.009091
	fertility relative to control	1	0.459986	0.531217	0.442747	0.456953	0.436218	0.133985		0.00490466
		Figure 2--figure supplement 1 (VSY values of diploids with competing wtf drivers)
		Diploid 36	Diploid 37	Diploid 38	Diploid 39	Diploid 40	Diploid 41		Diploid 42	Diploid 43
		1151x2430	2225x2430	2523x2430	2225x2532	2225x969	1535x1485	1537x1486	1496x3621	1496x2431
		0.205	0.215565	0.157729	0.1155	0.2904	0.165673	0.186214	0.167538	0.223385
		0.572	0.25542	0.1935	0.289528	0.424976	0.24354	0.286579	0.1936	0.168983
		1.124	0.304615	0.153551	0.117857	0.177453	0.231	0.297	0.0943953	0.27225
		0.348	0.243	0.205734	0.175645	0.405209	0.176	0.2376	0.111692	0.1815
		0.268		0.103714	0.1815	0.187759			0.2178
				0.209746	0.136125	0.330589
						0.388929
						0.6534
	average	0.5034	0.25465	0.170662	0.169359	0.357339	0.227951		0.157005	0.211529
	stdev	0.373649	0.0372403	0.0405493	0.0652462	0.152048	0.0490914		0.0527243	0.0466888
	p-value	0.000999	0.002797	0.0003996	0.0003996	8.227e-05	0.000666		0.004329	0.009524
	fertility relative to control	0.178459	0.0902752	0.060501	0.0600391	0.126679	0.0714613		0.0492203	0.0663133
