# Supplementary material for: Atypical meiosis can be adaptive in outcrossed Schizosaccharomyces pombe due to wtf meiotic drivers
Source: eLife. 2020 Aug 13;9:e57936. doi: 10.7554/eLife.57936 (PMC7426094; doi:10.7554/eLife.57936)
Supplement: Figure 3—source data 1. — Each of the rows represents the relevant genotype and allele transmission of the indicated diploid. The first column matches the diploid number from Figure 3 and Figure 3—figure supplement 1. In columns 2–5 are the SZY strain number and relevant genotypes used to determine the allele transmission for chromosome three in the Sp/Sk mosaic and control diploids. Column six shows the Rec12 phenotype for each diploid. Columns 7 and 8 indicate the number of spores that exhibited the indicated phenotype (Ade+ HygS or Ade- HygR, respectively). Column nine shows the number of spores that exhibited both phenotypes and are thus Ade+ and HygR. These spores are likely disomic. The total number of spores assayed is shown in column 10. Column 11 indicates the percentage of disomic spores (Ade+ and HygR). Column 12 indicates the p-values calculated when comparing diploids 18, 47, 48, and 49 to diploid 17, and diploids 21, 50, and 51 to diploid 20. Column 13 shows the percentage of the spores (excluding Ade+ HygR spores) that were Ade- HygR. Column 14 indicates the p-value calculated when comparing diploids 17, 18, and 47–49 to control diploid 19, and diploids 20, 21, 50, and 51 to control diploid 22. The last column shows the total number of independent diploids assayed for each cross. [file elife-57936-fig3-data1.xlsx]

## Sheet: Sheet1
Diploid #	allele 1 SZY#	ade6 GENOTYPE	allele 2 SZY#	ade6 GENOTYPE	Rec12 phenotype	Ade+ HygS	Ade- HygR	Ade+ HygR	# progeny assayed	% Ade+ HygR (disomy)	p value for disomy	% Ade- HygR (excluding disomes)	p value for % allele 2 (excluding disomes)	# diploids assayed
17	580	ade6+	296	ade6∆::hphMX6	Rec12-	44	32	1200	1276	0.940439	control	0.421053	0.1796	19
18	2008	ade6+	296	ade6∆::hphMX6	Rec12-	10	72	160	242	0.661157		0.878049		3
	2010	ade6+	296	ade6∆::hphMX6	Rec12-	24	134	324	482	0.672199		0.848101		4
						34	206	484	724	0.668508	1.463e-06	0.858333	0.005344	7
19	196	ade6+	208	ade6∆::hphMX6	Rec12-	100	136	85	321	0.264798	NA	0.576271	control	4
20	580	ade6+	297	ade6∆::hphMX6	Rec12+	92	97	397	586	0.677474	control	0.513	0.7126	10
21	2008	ade6+	297	ade6∆::hphMX6	Rec12+	32	242	87	361	0.241		0.883212		4
	2010	ade6+	297	ade6∆::hphMX6	Rec12+	18	195	94	307	0.306		0.915493		4
						50	437	181	668	0.270958	2.2e-16	0.897331	5.382e-09	8
22	294	ade6+	297	ade6∆::hphMX6	Rec12+	157	160	11	328	0.034		0.5047		6
	320	ade6+	293	ade6∆::hphMX6	Rec12+	128	138	24	290	0.083		0.5187		5
						285	298	35	618	0.0566	NA	0.5111	control	11
47	1391	ade6+	296	ade6∆::hphMX6	Rec12-	6	42	184	232	0.793103		0.875		4
	1392	ade6+	296	ade6∆::hphMX6	Rec12-	3	39	190	232	0.818966		0.928571		4
	1393	ade6+	296	ade6∆::hphMX6	Rec12-	10	33	189	232	0.814655		0.767442		4
	1394	ade6+	296	ade6∆::hphMX6	Rec12-	6	42	184	232	0.793103		0.875		4
						25	156	747	928	0.804957	0.01424	0.861878	0.008534	16
48	1699	ade6+	296	ade6∆::hphMX6	Rec12-	12	93	391	496	0.788306	0.02469	0.885714	0.0161	4
49	580	ade6+	1345	ade6∆::hphMX6	Rec12-	9	17	294	320	0.91875		0.653846		4
	580	ade6+	1346	ade6∆::hphMX6	Rec12-	11	13	307	331	0.927492		0.541667		4
						20	30	601	651	0.9232	0.7897	0.6	0.8743	8
50	1391	ade6+	297	ade6∆::hphMX6	Rec12+	4	159	62	225	0.276	1.925e-09	0.976	1.061e-06	3
51	1699	ade6+	297	ade6∆::hphMX6	Rec12+	14	163	55	232	0.237	7.119e-12	0.921	6.016e-06	4
