# Supplementary material for: Atypical meiosis can be adaptive in outcrossed Schizosaccharomyces pombe due to wtf meiotic drivers
Source: eLife. 2020 Aug 13;9:e57936. doi: 10.7554/eLife.57936 (PMC7426094; doi:10.7554/eLife.57936)
Supplement: Figure 3—source data 2. — The top table shows the data for Figure 3. The bottom table shows the data for Figure 3—figure supplement 1. Each column represents the diploid assayed, which matches the diploid numbers in Figure 3 and Figure 3—figure supplement 1. The first row shows the figure where the data are reported. The second row shows the diploid number. The third row shows the SZY strain numbers of both haploid parent strains. We present all of the viable spore yield values from independent assays. We calculated the p-value using the Wilcoxon test by comparing diploids 18, 47, 48, and 49 to diploid 17, and diploids 21, 50, and 51 to diploid 20. [file elife-57936-fig3-data2.xlsx]

## Sheet: Sheet1
	Figure 3 (VSY values)
	diploid 17	diploid 18		diploid 19	diploid 20	diploid 21		diploid 22
	580x296	2008x296	2010x296	208x196	580x297	2008x297	2010x297	294x297	293x320
	0.204319	0.171947	0.2904	0.539786	0.0710769	0.488172	0.568333	3.23438	2.42069
	0.230175	0.146284	0.34848	0.436615	0.201536	0.6171	0.320447	2.4	3.09
	0.17325	0.231702	0.293857	0.566617	0.0939661	0.74052	0.771375	1.62439	3.97059
	0.239049		0.295322	1.11788	0.142421	2.7225	0.6534	2.75625	3.54375
	0.0815294				0.137077			2.18	2.88
	0.0542143				0.117333			1.01739
	0.137077				0.3905
	0.154				0.166737
	0.294938				0.119842
	0.2079				0.2871
	0.249333
	0.22968
average	0.187955	0.253999		0.665223	0.172759	0.860231		2.64704
stdev	0.0708282	0.0734622		0.306927	0.0977313	0.765988		0.848245
p-value	control	0.09905		NA	control	9.141e-05		NA
relative fertility	0.0710059	0.0959558		0.251308	0.0652649	0.324979		1
	Figure 3-figure supplement 1 (VSY values)
	Diploid 47				Diploid 48	Diploid 49		Diploid 50	Diploid 51
	1391x296	1392x296	1393x296	1394x296	1699x296	580x1345	580x1346	1391x297	1699x297
	0.249652	0.380368	0.194464	0.56925	0.192879	0.162871	0.176786	0.126225	0.408774
	0.322385	0.542793	0.66825	0.44352	0.137323	0.300194	0.31573	0.183563	0.307607
	0.523286	0.547412	0.532853	0.6237	0.208607	0.243	0.145895	0.13275	0.29498
	0.39	0.3245	0.436966	0.2937	0.150207	0.185362	0.26235		0.209512
					0.27225
					0.140049
					0.201808
					0.328263
					0.177692
average	0.440194				0.201009	0.224023		0.147513	0.305218
stdev	0.139376				0.0635315	0.0650393		0.0313902	0.0816377
p-value	5.333e-05				0.9716	0.2799		1	0.02398
relative fertility	0.166297				0.0759372	0.0846316		0.0557274	0.115305
