# Supplementary material for: Atypical meiosis can be adaptive in outcrossed Schizosaccharomyces pombe due to wtf meiotic drivers
Source: eLife. 2020 Aug 13;9:e57936. doi: 10.7554/eLife.57936 (PMC7426094; doi:10.7554/eLife.57936)
Supplement: Figure 4—source data 1. — Each of the rows represents the relevant genotype and allele transmission of the indicated diploid. The first column matches the diploid number from Figure 4C and Figure 4—figure supplement 2. In columns 2–5 are the SZY strain number and relevant genotypes used to determine the allele transmission of the wtf genes or empty vector. Column six indicates if the diploid has a rec12+ or rec12- phenotype. Columns 7 and 8 indicate the genotype (ura+ or ura- spores). Columns 10 and 11 indicate the number of haploid spores that exhibited the indicated phenotype (G418R or G418S). Column 12 shows the number of spores that exhibited the G418R HygR phenotype. Column 16 indicates the total number of spores assayed excluding G418R HygR spores. Column 17 indicates the total number of spores assayed. Column 18 shows the total number of independent diploids assayed for each genotype. The last two columns show the p-values calculated using a G-test from the allele transmission at ade6 and the frequency of G418R HygR spores, respectively. To calculate the p-values, we compared diploid 24 to control diploid 23; diploid 26 to control 25; and diploid 52 to control diploid 53. The data for diploid 23 were previously published in Bravo Núñez et al., 2020. The raw data for diploid 23 and 24 is also presented in Figure 2—source data 1 and Figure 6—source data 1. [file elife-57936-fig4-data1.xlsx]

## Sheet: Sheet1
Diploid #	allele 1 SZY#	GENOTYPE	allele 2 SZY#	GENOTYPE	Rec12 phenotype	ura+	ura-	% ura+ (control)	G418R	G418S	HYGR G418R	% HYGR G418R	% G418R (excluding HYGR G418R)	% G418S (excluding HYGR G418R)	# progeny assayed (w/o HYGR G418R)	# progeny assayed	# diploids assayed	p-value allele transmission	p-value HYGR G418R progeny
23	925	ade6-::kanMX4	1180	ade6-::hphMX6	rec12+	584	513	0.532361	452	645	116	9.6	0.412033	58.797	1097	1213	9	control	control
24	887	ade6-::Sk wtf4:kanMX4	1293	ade6-::Sk wtf28:hphMX6	rec12+	105	120	0.466667	163	62	766	77.3	0.724444	27.556	225	991	23	1.826e-06	2.2e-16
25	1770	ade6-::kanMX4	1994	ade6-::hphMX6	rec12-	NA	NA	NA	141	192	64	16.121	0.423423	57.658	333	397	7	control	control
26	1583	ade6-::Sk wtf4:kanMX4	1585	ade6-::Sk wtf28:hphMX6	rec12-	NA	NA	NA	119	78	784	79.918	0.604061	39.594	197	981	14	0.02083	2.2e-16
Diploid #	allele 1 SZY#	GENOTYPE	allele 2 SZY#	GENOTYPE	mutant	ade+	ade-	% ade+ (control)	ura+	ura-	Ura+ G418R	% Ura+ G418R	% Ura+ (excluding Ura+ G418R)	% Ura- (excluding Ura+ G418R)	# progeny assayed (w/o Ura+ G418R)	# progeny assayed	# diploids assayed	p-value allele transmission	p-value Ura+ G418R progeny
52	186	ura4+	3539	ura4-::FY29033 wtf35::kanMX4, Sk wtf4△	rec12+	125	99	0.55804	36	188	97	30.218	0.16071	83.929	224	321	5	8.707e-05	1.887e-15
53	186	ura4+	47	ura4△::kanMX4	rec12+	173	165	0.51183	172	166	16	4.52	0.50888	49.112	338	354	8	control	control
