# Supplementary material for: Atypical meiosis can be adaptive in outcrossed Schizosaccharomyces pombe due to wtf meiotic drivers
Source: eLife. 2020 Aug 13;9:e57936. doi: 10.7554/eLife.57936 (PMC7426094; doi:10.7554/eLife.57936)
Supplement: Figure 4—source data 2. — Each column represents the diploid assayed, which matches the diploid number in Figure 4 and Figure 4—figure supplement 2. The first row shows the figure where the data are presented. The second row shows the diploid number. The third row shows the SZY strain numbers of both haploid parent strains. We present all of the viable spore yield values from independent assays. To calculate the p-value, we used the Wilcoxon test and compared diploid 24 to control diploid 23; diploid 26 to control diploid 25; and diploid 52 to control diploid 53. The data for diploid 23 were previously published in Bravo Núñez et al., 2020. The raw data for diploid 23 and 24 are also presented in Figure 2—source data 2 and Figure 6—source data 2. [file elife-57936-fig4-data2.xlsx]

## Sheet: Sheet1
	Figure 4 (VSY values)						Figure 4-figure supplement 2 (VSY values)
	diploid 23	diploid 24		diploid 25	diploid 26		Diploid 52	Diploid 53
	925x1180	887x1293		1994x1770	1583x1585		3539x186	47x186
	2.56235	0.0932885	0.5566	0.70785	0.109421	0.130596	0.246316	3.78947
	2.04732	0.111984	0.394293	0.962372	0.0451324	0.0817826	0.271429	6.75
	1.9602	0.281962	0.63525	0.579255	0.09075	0.288316	0.263333	9.16129
	2.01465	0.259875	0.294938	0.81675	0.0835313	0.252804	0.357576	4.05882
	2.51965	0.0531667	0.266694	1.089	0.0955263	0.1815	0.316	6.12121
	2.55678	0.105	0.236739	1.21	0.05775			8.73913
	2.88538	0.509371	0.3267	1.1055	0.0612857			3.775
	4.56879	0.0714098	0.314135		0.11025			3.2623
	4.27223	0.639196	0.578531		0.135837
		0.555176	0.420316		0.124277
		0.420316	0.899609		0.136125
		0.66825			0.0893415
average	2.82082	0.377948		0.92439	0.122013		0.290931	5.70715
stdev	0.960617	0.224654		0.231123	0.0654987		0.0452837	2.34484
p-value	control	control		0.0001748	0.000233		0.001554	control
relative fertility	1	0.133985		0.327703	0.0432546		0.0509765	1
