# Supplementary material for: Atypical meiosis can be adaptive in outcrossed Schizosaccharomyces pombe due to wtf meiotic drivers
Source: eLife. 2020 Aug 13;9:e57936. doi: 10.7554/eLife.57936 (PMC7426094; doi:10.7554/eLife.57936)
Supplement: Figure 5—source data 1. — The top columns represent the S. pombe diploid assayed and the backgrounds in which it was tested (rec12+ or rec12Δ). The SZY strain numbers of both of the haploid parental strain are shown underneath the rec12 genotype. We present all of the viable spore yield values from independent assays. For statistical analyses, in every case, the rec12Δ diploid was compared to the rec12+ diploid. The raw data from the rec12+ crosses are also shown in Figure 1—source data 1. The raw data for the Sk rec12Δ are also presented in Figure 3—source data 2. [file elife-57936-fig5-data1.xlsx]

## Sheet: Sheet1
	Figure 5 heterozygous (VSY values)
	Sp/Sk		CBS5680/Sp		JB844/Sp		CBS5680/Sk		JB844/Sk
	rec12+	rec12△	rec12+	rec12△	rec12+	rec12△	rec12+	rec12△	rec12+	rec12△
	297x480	201x208	643x2111	3834x3995	643x2222	3909x3834	197x2111	122x3995	197x2222	3909x122
	0.0781818	0.119444	0.509369	0.214499	0.378783	0.435598	0.239048	0.327938	0.626997	0.422263
	0.0808511	0.110256	0.511161	0.48817	0.372553	0.719148	0.280027	0.232535	0.406341	0.470248
	0.117073	0.0508475	0.332236	0.408373	0.0554401	0.59226	0.15675	0.131431	1.089	0.593997
	0.1	0.0842105		0.362998	0.714095	0.245024	0.159261	0.168474	0.878838	0.560055
	0.220588	0.0794118				0.977303	0.175018	0.133435	0.71348	0.683788
	0.0456522	0.0736842				0.706892	0.206082	0.143449		0.462823
						0.514798	0.17985
						0.725997
						0.58339
						0.388927
average	0.107058	0.0863091	0.450922	0.36851	0.380218	0.588934	0.199434	0.189544	0.74293	0.532196
stdev	0.0605484	0.0250612	0.102789	0.114974	0.268958	0.207582	0.0456876	0.0775824	0.257794	0.0982964
p-value	control	0.8182	control	0.4	control	0.1419	control	0.366	control	0.1775
	Figure 5 homozygous (VSY values)
	Sp/Sp			Sk/Sk		CBS5680/CBS5680			JB844/JB844
	rec12+	rec12△		rec12+	rec12△	rec12+	rec12△		rec12+	rec12△
	2464x2538	2397x790	2398x791	180x186	208x196	2111x2213	3995x4065	3995x4066	2222x2153	3909x3910	3909x3911
	2.38125	0.813462	0.670909	3.45	0.539786	3.67013	1.87059	1.806	7.39286	1.26	3.0375
	2.57647	0.497872	0.518182	2.736	0.436615	4.00235	1.95082		6.66383	3.42	1.8
	3.33529	0.69375	0.835714	2.43529	0.566617	3.53165	1.80328		5.36087		1.72
	1.89184	0.510448		2.52	1.11788	4.45846	1.94915		5.28197
	1.9575					3.82785			4.60909
	1.6875					2.688
	1.764					2.99032
	1.84186					5.17895
	2.286
average	2.1913	0.64862		2.78532	0.665223	3.79346	1.87597		5.86172	2.2475
stdev	0.524997	0.143493		0.460849	0.306927	0.788982	0.0727443		1.134	0.929049
p-value	control	0.0001748		control	0.02857	control	0.001554		control	0.007937
