# Supplementary material for: Atypical meiosis can be adaptive in outcrossed Schizosaccharomyces pombe due to wtf meiotic drivers
Source: eLife. 2020 Aug 13;9:e57936. doi: 10.7554/eLife.57936 (PMC7426094; doi:10.7554/eLife.57936)
Supplement: Figure 6—source data 2. — Each column represents the diploid assayed, which matches the diploid number in Figure 6 and Figure 6—figure supplement 1. The diploid number and SZY strain numbers of both haploid parental strains are shown at the top. We present all the viable spore yield values from independent assays. We calculated the p-value using the Wilcoxon test by comparing diploids 25, 27, 28, 54, 56, 58, and 60 to control diploid 23; and diploids 26, 29, 30, 55, 57, 59, and 61 to control diploid 24. For comparison purposes, we included the data for diploids 23–26, which are also shown in Figure 2—source data 2 and Figure 4—source data 2. The data for diploid 23 were previously published in Bravo Núñez et al., 2020. [file elife-57936-fig6-data2.xlsx]

## Sheet: Sheet1
	Figure 6 (VSY values)
	diploid 23	diploid 24		diploid 27	diploid 28	diploid 29	diploid 30
	925x1180	887x1293		3601x925	2494x1180	3603x887	2496x1293
	2.56235	0.0932885	0.5566	2.05	1.44737	0.847826	0.530303
	2.04732	0.111984	0.394293	3.45714	2.02564	0.846154	0.788889
	1.9602	0.281962	0.63525	1.82353	1.53333	0.804878	0.469697
	2.01465	0.259875	0.294938	1.82759	4.04082	0.761905	0.45283
	2.51965	0.0531667	0.266694		2.22222	1.11765	0.415094
	2.55678	0.105	0.236739			0.844828	0.388889
	2.88538	0.509371	0.3267			1.18182
	4.56879	0.0714098	0.314135
	4.27223	0.639196	0.578531
		0.555176	0.420316
		0.420316	0.899609
		0.66825
average	2.82082	0.377948		2.28956	2.25388	0.915008	0.507617
stdev	0.960617	0.224654		0.785545	1.0507	0.164316	0.146099
p-value	control	control		0.2601	0.1898	0.0002135	0.1963
relative fertility	1	0.133985		0.811667	0.799015	0.324377	0.179954
	Figure 6-figure supplement 1 (VSY values)
	diploid 25	diploid 26		diploid 54	diploid 55	diploid 56	diploid 57	diploid 58	diploid 59	diploid 60	diploid 61
	1994x1770	1583x1585		2500x2521	2036x2038	2542x2546	2544x2548	2494x2515	2496x2498	3354x3601	3356x3603
	0.70785	0.109421	0.130596	0.520826	0.16335	0.639196	0.193787	0.648766	0.6534	0.355109	0.287571
	0.962372	0.0451324	0.0817826	0.473478	0.159923	0.3872	0.1694	1.05697	0.748688	0.630474	0.69696
	0.579255	0.09075	0.288316	0.589875	0.059125	0.647514	0.241313	0.696246	0.3465	0.576529	0.782719
	0.81675	0.0835313	0.252804	0.378783	0.0738806	0.2376	0.137211	0.903638	0.33275	0.363	0.1815
	1.089	0.0955263	0.1815	0.464426	0.120814	0.251167	0.125812	0.556085	0.26561		0.2178
	1.21	0.05775		0.224053	0.0955862	0.3267	0.0773438	0.421548	0.229059		0.171947
	1.1055	0.0612857		0.4356	0.07326	0.228938	0.0365538	0.590644	0.2475		0.363
		0.11025				0.5445	0.0718548	0.8954	0.200475
		0.135837				0.167538	0.0733966	0.9075	0.202714
		0.124277					0.0507692	0.442983	0.162938
		0.136125							0.195462
		0.0893415
average	0.92439	0.122013		0.441006	0.106563	0.38115	0.117744	0.711978	0.325918	0.481278	0.385928
stdev	0.231123	0.0654987		0.116265	0.042472	0.184906	0.0674506	0.217971	0.194965	0.142876	0.251737
p-value	0.0001748	0.000233		0.0001748	0.004806	4.114e-05	0.001147	2.165e-05	0.4286	0.005414	0.9804
relative fertility	0.327703	0.0432546		0.15634	0.0377772	0.13512	0.0417411	0.252401	0.11554	0.170616	0.136814

## Sheet: Sheet2
			Figure 6-figure supplement 2 (VSY values)
			diploid 76	diploid 77	diploid 78	diploid 79
			3601x925	2494x1180	3603x887	2496x1293
		2.56235	2.05	1.44737	0.847826	0.530303	0.908314	0.726693	0.513069	0.300541	0.187984
		2.04732	3.45714	2.02564	0.846154	0.788889	0.725743	1.2255	0.718058	0.299948	0.279649
		1.9602	1.82353	1.53333	0.804878	0.469697	0.69486	0.646412	0.543542	0.285317	0.1665
		2.01465	1.82759	4.04082	0.761905	0.45283	0.714162	0.64785	1.43241	0.270083	0.160521
		2.51965		2.22222	1.11765	0.415094	0.893175		0.787743	0.396188	0.147144
		2.55678			0.844828	0.388889	0.906339			0.299478	0.137855
		2.88538			1.18182		1.02282			0.418936
		4.56879					1.61957
		4.27223					1.51444
							0.999935	0.811615	0.798964	0.324356	0.179942
							0.340523	0.278463	0.372457	0.0582475	0.0517899
							0.113508	0.139232	0.166568	0.0220155	0.0211431
			2.28956	2.25388	0.915008	0.507617
			0.785545	1.0507	0.164316	0.146099
			0.2601		0.0002135
			#REF!	#REF!	#REF!	#REF!
